# Supplementary material for: Cysteine-mediated decyanation of vitamin B12 by the predicted membrane transporter BtuM
Source: PubMed Central journal article supplement (PMC6072759; doi:10.1038/s41467-018-05441-9), 2018-08-02
Supplement: 41467_2018_5441_MOESM1_ESM.pdf [file 41467_2018_5441_MOESM1_ESM.pdf]

1

2

**Cysteine-mediated decyanation of vitamin B12 by the**

3

**predicted membrane transporter BtuM**

4

5

6

7

Rempel S., et al.

8

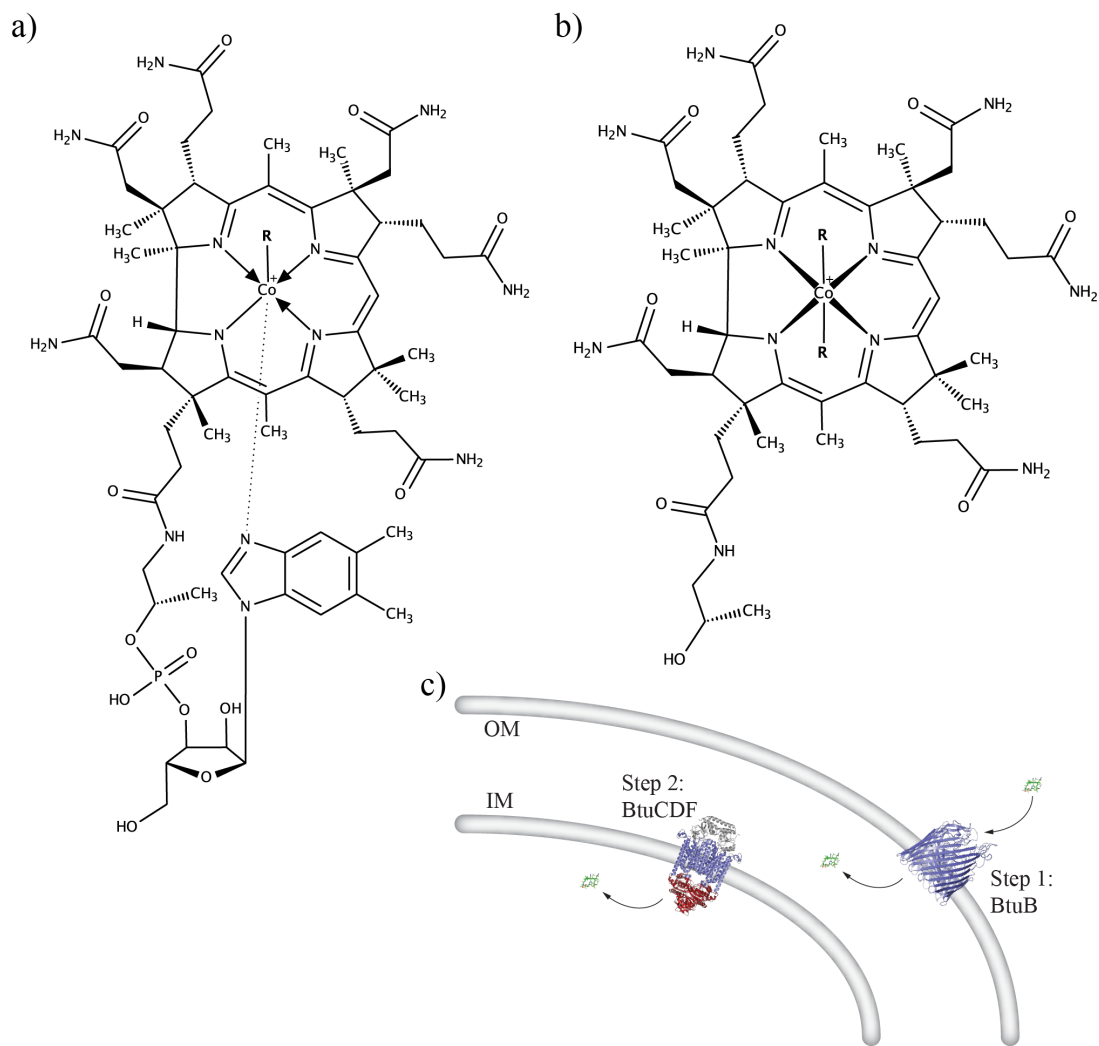

9

10 **Supplementary Figure 1 Structure of cobalamin and cobinamide**

11 **(a)** Structural formula of cobalamin (Cbl) where R can be a cyano group (cyano-Cbl), a hydroxyl group  
 12 (OH-Cbl), a methyl-group (CH<sub>3</sub>-Cbl) or a 5'-deoxyadenosyl group (ado-Cbl). The latter two are two of  
 13 three biologically active variants of the vitamin. The third variant is found in epoxyqueuosine  
 14 oxidoreductases, which bind Cbl in an 'open conformation' where R is a water and Cbl is bound in the  
 15 base-off conformation and its cobalt ion is kept penta-coordinate (in contrast to the 'normal' hexa-  
 16 coordinate) and thus in its divalent state. **(b)** The Cbl precursor cobinamide (Cbi) has two variable  
 17 groups, R. In this study, di-cyano Cbl was used. **(c)** The uptake of Cobalamin in *E. coli* requires the  
 18 translocation of Cbl (green) over the outer (OM) and inner (IM) membrane. BtuB is the TonB-  
 19 dependent outer membrane active transporter (PDB: 2GSK) and BtuCDF (PDB: 4FI3) is a type II  
 20 ABC-importer. Together they form the full BtuBCDF transport pathway. In our deletion strain, *E. coli*  
 21 ΔFEC, the *btuB* gene locus is still present.

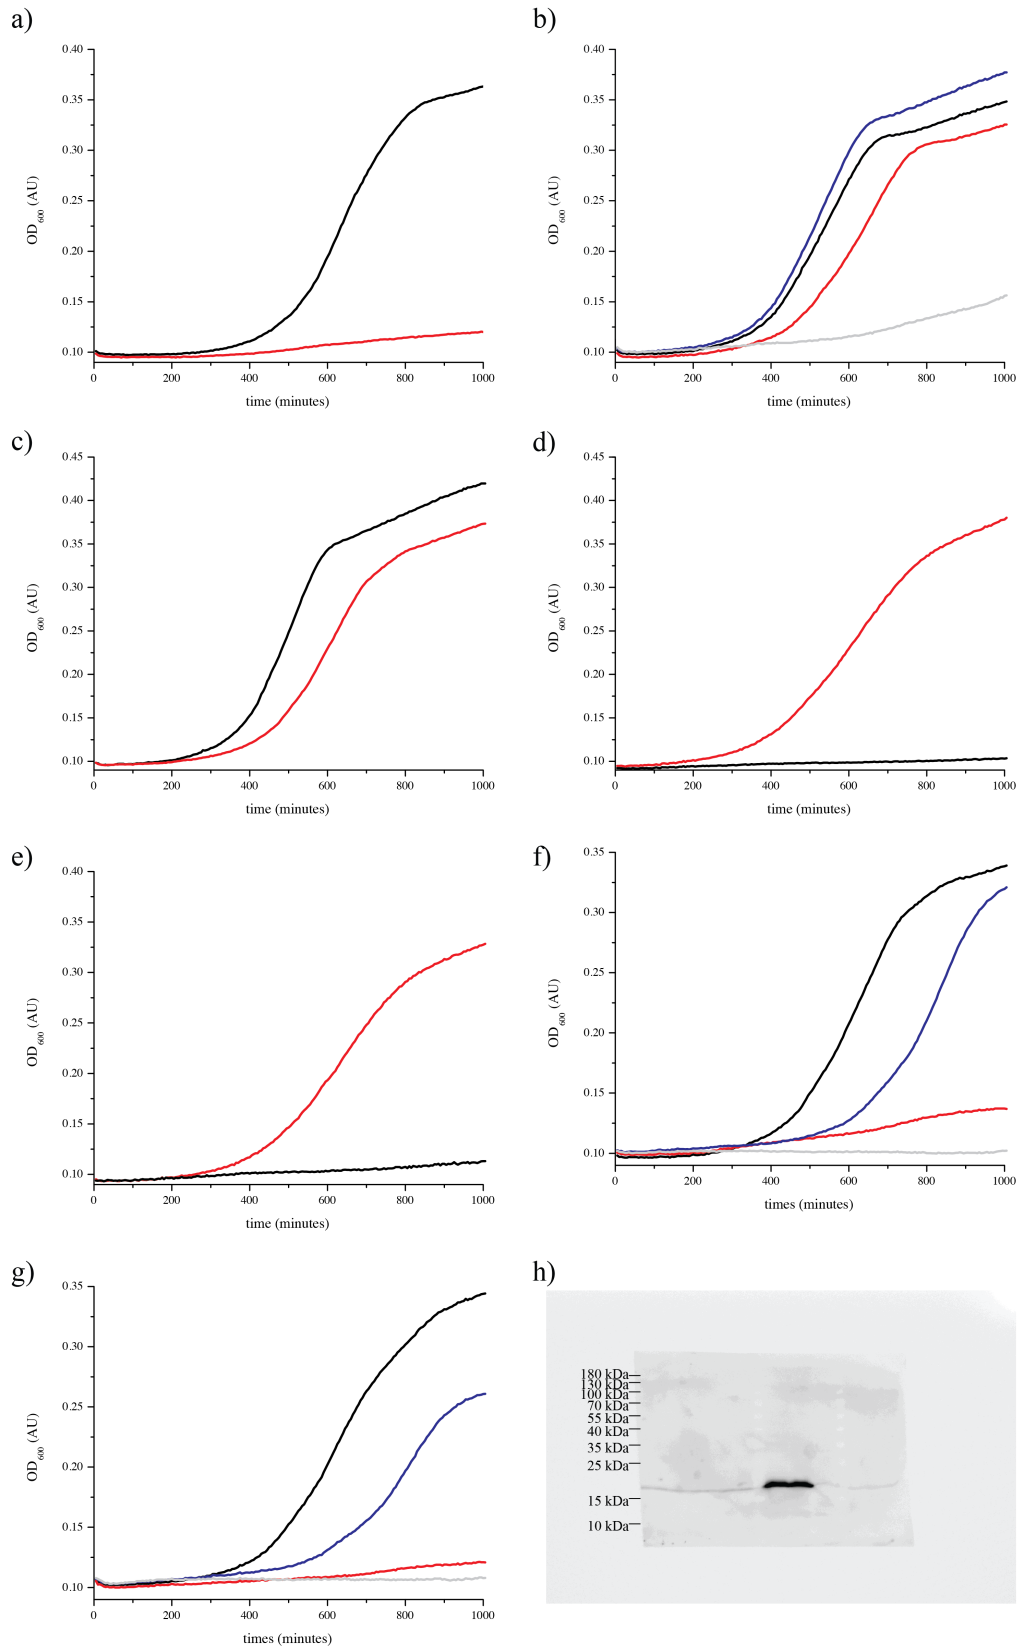

22

23 **Supplementary Figure 2 Growth assay in the presence of OH-Cbl and Cbi and using extreme Cbl**  
 24 **concentrations**

25 All growth curves are averages of biological triplicates each consisting of technical triplicates. (a) *E.*  
 26 *coli* ΔFEC without expression plasmid can grow in the presence of 50 μg/ml L-methionine (black line)

27 but not in the presence of 1 nM Cbl (red line). **(b)** Growth of *E. coli*  $\Delta$ FEC expressing EPEA-tagged  
28 versions of BtuM<sub>Td</sub>. In the presence of 50  $\mu$ g/ml L-methionine both wild-type and C80S mutant grow  
29 (black and blue line, respectively), whereas in the presence of 1 nM Cbl only BtuM<sub>Td</sub> (red line) can  
30 grow and the C80S mutant does not exhibit substantial growth (grey line). **(c)** Growth of tag-less  
31 BtuM<sub>Td</sub> expressing cells shows that the His-tag does not affect activity of BtuM<sub>Td</sub> *in vivo* in the  
32 presence of either L-methionine (black line) or Cbl (red line). **(d)** Growth assay in the presence of 0.1  
33 nM OH-Cbl of cells expressing BtuCDF (red line) and control carrying the empty expression vector  
34 (black line). **(e)** Growth assay in the presence of 0.1 nM OH-Cbl of wild-type BtuM<sub>Td</sub> expressing cells  
35 (red line) and the C80S mutant (black line). **(f)** At Cbl concentrations of 5 nM both BtuCDF expressing  
36 cells (black line) and empty expression vector carrying cells (blue line) grow whereas 0.01 nM Cbl is  
37 insufficient to sustain grow for either BtuCDF expressing cells (red line) or cells carrying pBAD24  
38 (grey line). **(g)** For cells expressing His-tagged BtuM<sub>Td</sub> (black and red lines) and BtuM<sub>Td</sub>-C80S (blue  
39 and grey lines) under the same conditions as in e) we observe the same behaviour. **(h)** Full length  
40 western blot of the inset in **Figure 1 b**.

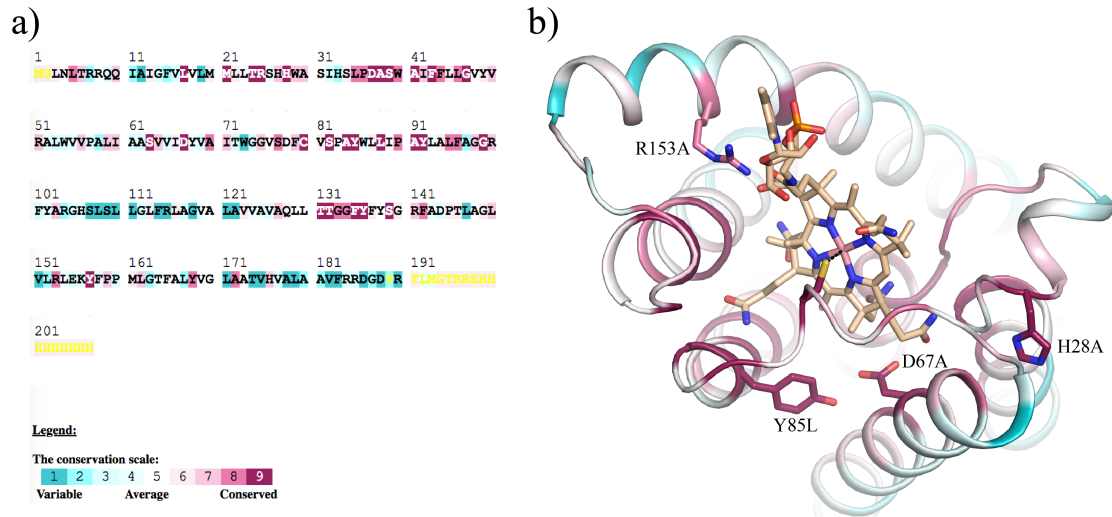

41  
42  
43  
44  
45  
46  
47  
48

**Supplementary Figure 3 Sequence conservation in the BtuM family**

(a) Amino acid sequence of BtuM<sub>Td</sub> with colour key showing the degree of conservation (yellow residues with insufficient data). Residue Cys80 is completely conserved. (b) View from the periplasmic side of the membrane on the BtuM<sub>Td</sub> binding pocket. The colouring of residues by conservation was mapped on the structure using the ConSurf Server. Four residues were chosen and mutant protein variants were constructed, BtuM<sub>Td</sub>-H28A, D67A, Y85L, and R153A.



a)

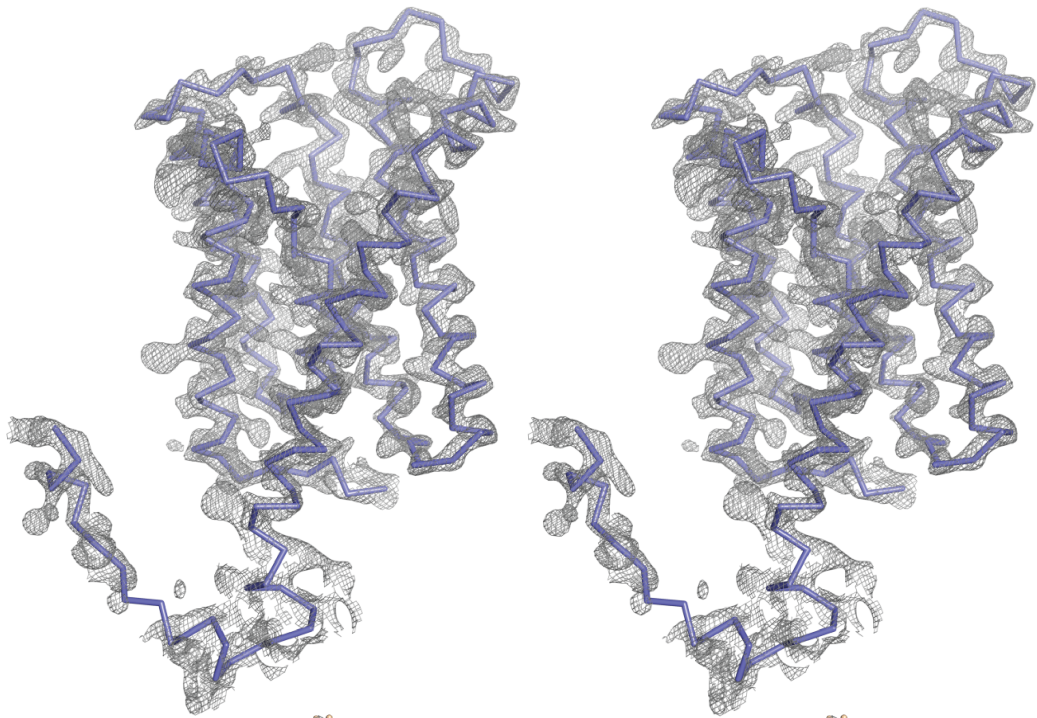

b)

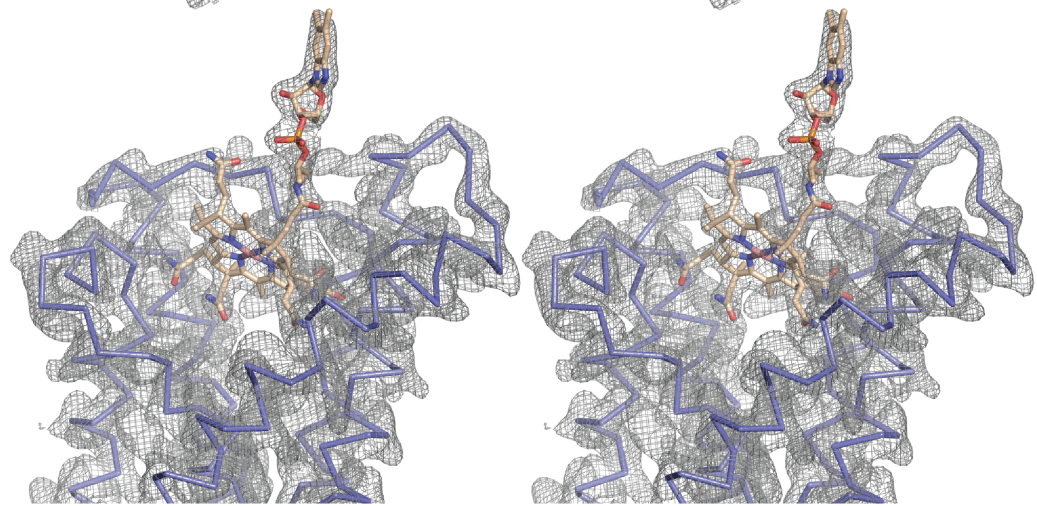

c)

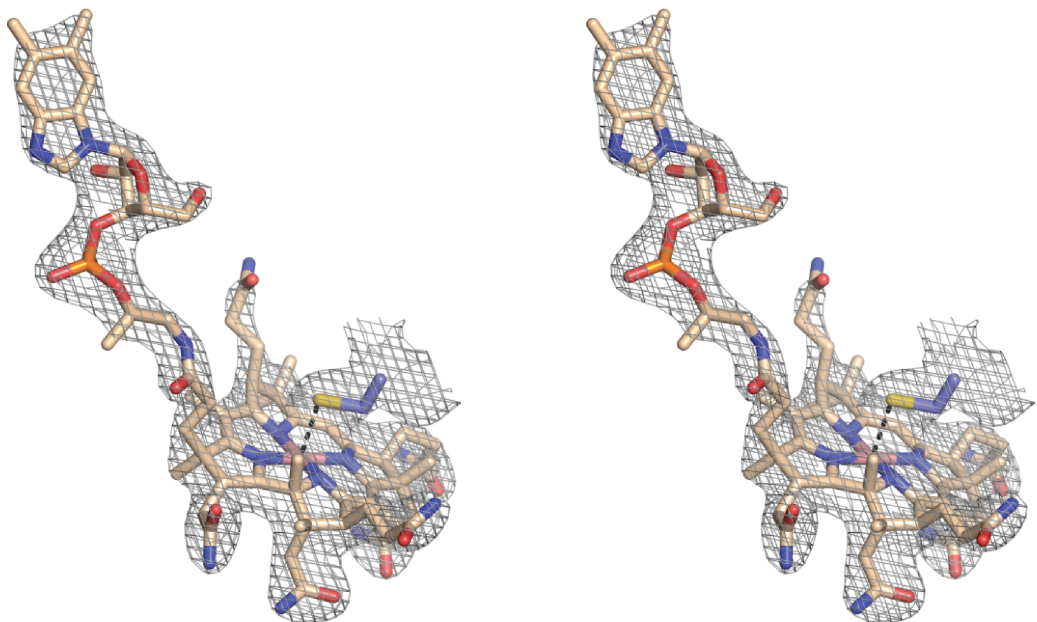

55 **Supplementary Figure 5 Stereo view images of the main chain traced electron density of BtuM<sub>Td</sub>**  
56 **and its binding pocket and vitamin B12**

57 **(a)** Stereo view image of the full-length ribbon traced model with its corresponding 2fo-fc density map  
58 (grey) at  $2\sigma$  (residues 3-182 and 202-207) and  $0.5\sigma$  (residues 1-2 and 183-201). **(b)** The same model as  
59 in (a) focused on the binding pocket including Cbl and its corresponding 2fo-fc density (grey) at  $2\sigma$ . **(c)**  
60 Stereo view on Cbl and Cys80 with their 2fo-fc density map (grey) at  $2\sigma$ .



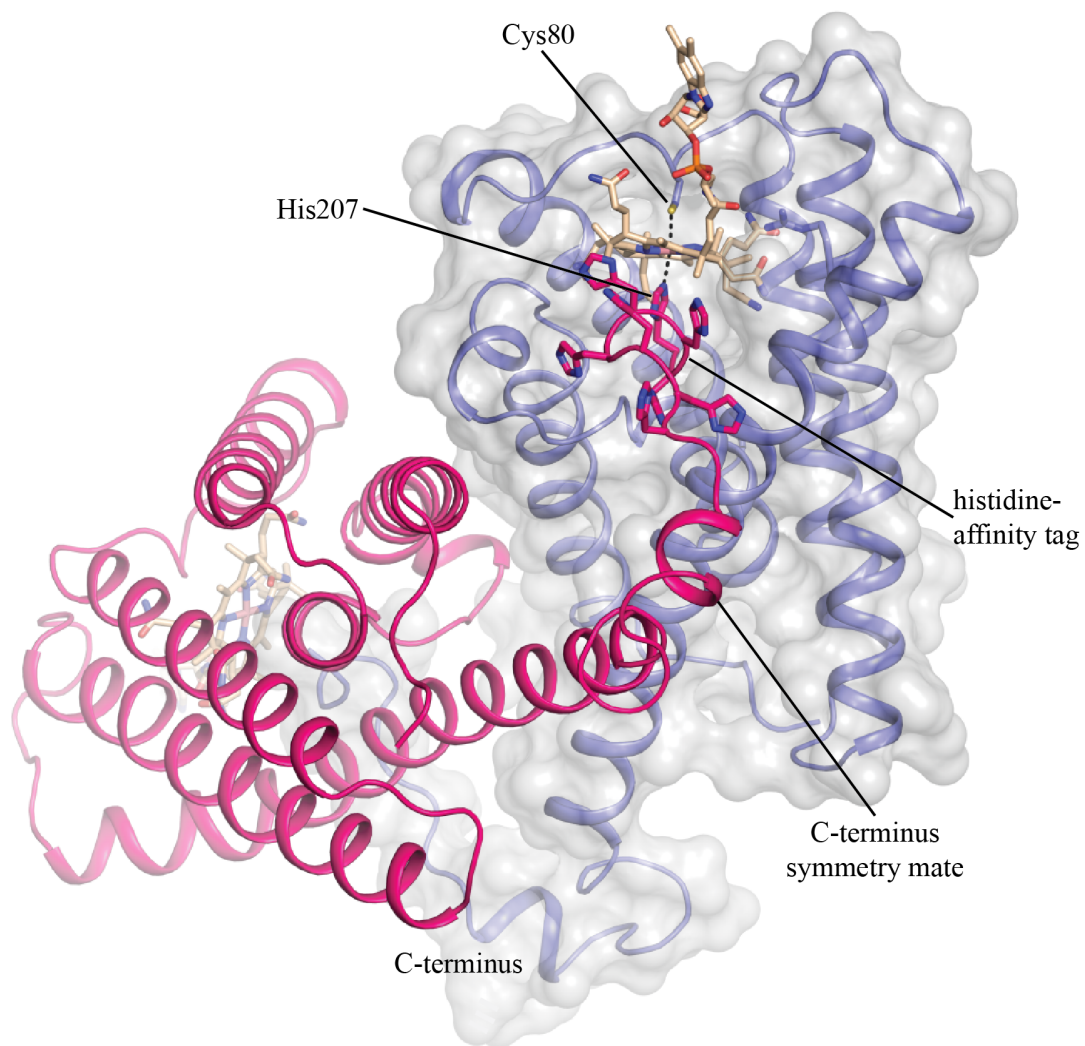

61

62 **Supplementary Figure 6 BtuM<sub>Td</sub> and its neighbouring symmetry mate in the crystal**

63 The two symmetry mates (blue and pink) align almost antiparallel allowing the C-terminal histidine-  
 64 affinity tags to mutually enter into each other's binding pocket. The last His207 then binds the Co-ion  
 65 of Cbl.

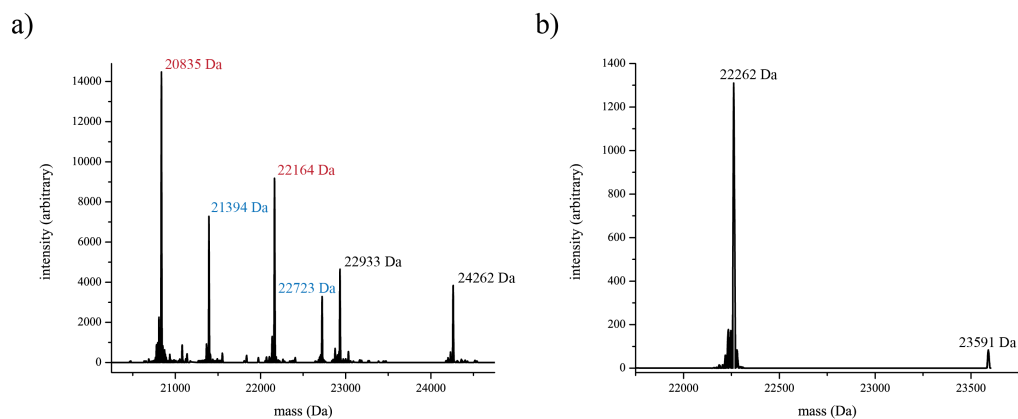

66

67 **Supplementary Figure 7 Mass spectrometry analysis of BtuM<sub>Td</sub>-cHis8 and BtuM<sub>Td</sub>-cEPEA**  
 68 **bound to co-purified Cbl showing the loss of the  $\beta$ -ligand**

69 **(a)** BtuM<sub>Td</sub>-cHis (native mass of 22905 Da) bound to Cbl yields multiple peaks. These peaks can be  
 70 separated into three pairs of which the higher mass corresponds to the substrate-bound protein and the  
 71 lower mass to the *apo* form. The mass differences are 1329 Da, which corresponds to the mass of Cbl  
 72 without  $\beta$ -ligand. The masses labelled in black (22933 Da and 24262 Da) are the native protein with a  
 73 formylated first methionine (adding 28 Da). The pair labelled in red (20835 Da and 22164 Da) and the  
 74 pair labelled in blue (21394 Da and 22723 Da) correspond to truncated forms with loss of a 2098 Da C-  
 75 terminal peptide (red) and 1539 Da C-terminal peptide (blue). The amino acid sequences of the lost  
 76 peptides of the truncated versions are LMGTRRERHHHHHHHHH (red) and RERHHHHHHHHH (blue).  
 77 **(b)** BtuM<sub>Td</sub>-cEPEA (native mass 22234 Da) also shows the loss of the  $\beta$ -ligand. We observe the mass  
 78 for formylated *apo* protein (22262 Da) and formylated substrate-bound protein (23591 Da). The  
 79 difference between the two (1329 Da) is the mass of decyanated Cbl.

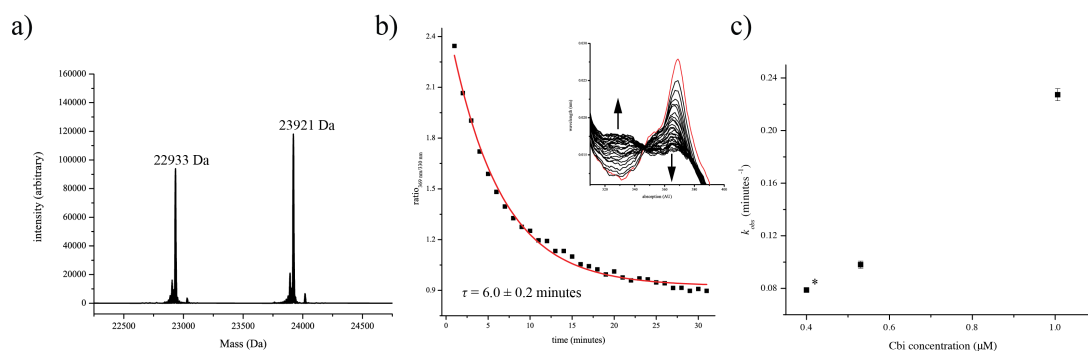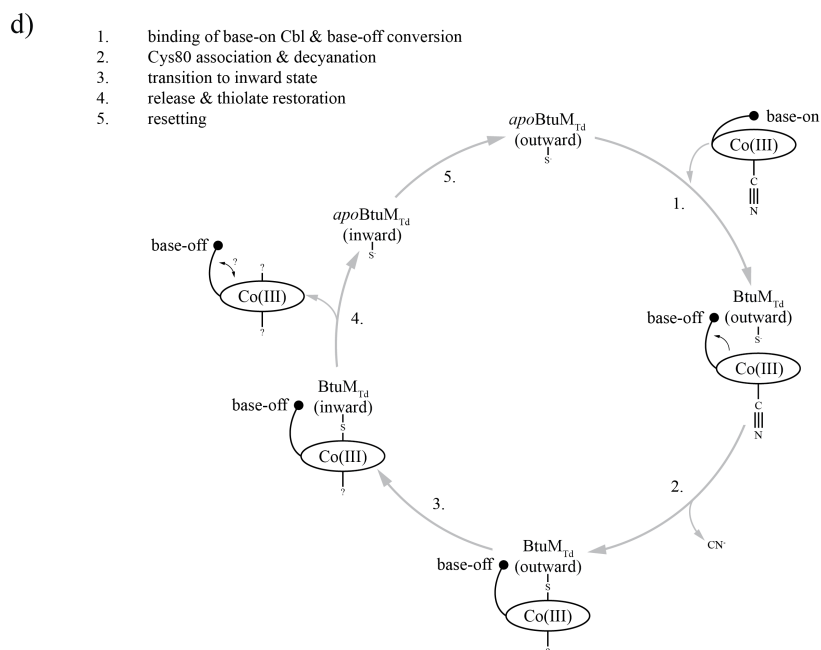

80

81 **Supplementary Figure 8 High resolution mass spectrum of BtuM<sub>Td</sub> bound to Cbi and**  
 82 **decyanation of Cbi by His-tagged BtuM<sub>Td</sub> and proposed mechanism for decyanation**

83 (a) The formylated apo protein with M<sub>w</sub> of 22933 Da (similar to **Supplementary Figure 7 a**) and a  
 84 peak for the substrate bound protein (23921 Da) are visible. The difference of the two masses is 988 Da,  
 85 close to the mass of decyanated Cbi of 990 Da; because dicyano-Cbi was added during the purification  
 86 (M<sub>w</sub> of 1042 Da) the data indicates that the protein removed both cyano groups. (b) Spectral changes  
 87 of a 5:1 His-tagged BtuM<sub>Td</sub> (0.5 – 1.3 μM) to Cbi molar ratio mixture were monitored over time  
 88 (starting spectrum red line). The absorption increased at 330 nm and decreased at 369 nm. These  
 89 changes are consistent with removal of cyanide from the substrate. His-tagged BtuM<sub>Td</sub> and EPEA-  
 90 tagged BtuM<sub>Td</sub> behaved similarly (compare **Figure 3 b and c**) (c) Decyanation assay with a fixed  
 91 concentration (4 μM) of EPEA-tagged BtuM<sub>Td</sub> with increasing concentrations of Cbi (\* value from  
 92 single experiment, other points averaged from triplicates with standard deviation as the error of the  
 93 mean) showing that the decyanation process follows the kinetics of a pseudo-first order binding  
 94 reaction. (d) Possible mechanism of decyanation. Decyanation of the substrate that is in its base-on  
 95 conformation at physiological pH in the periplasm with a trivalent Co-ion, binds to BtuM<sub>Td</sub> with its  
 96 binding pocket exposed to the extracellular side (step 1). The cysteine replaces the α-ligand. We  
 97 assume that the side chain of Cys80 is in its thiolate form allowing it to donate one electron to allow for

98 a simple one-step reductive decyanation (step 2). We propose that the Co ion remains in its trivalent  
99 state (hexa-coordinate) throughout the reaction. We hypothesize that release of Cbl on the intracellular  
100 side (step 3) of the membrane and breaking of the Co-S bond is achieved by the reducing environment  
101 of the cell allowing the Cys80 to return in its thiolate state (step 4) making it accessible to undergo  
102 another reaction once the membrane protein has transitioned back to the outward facing conformation  
103 (step 5).

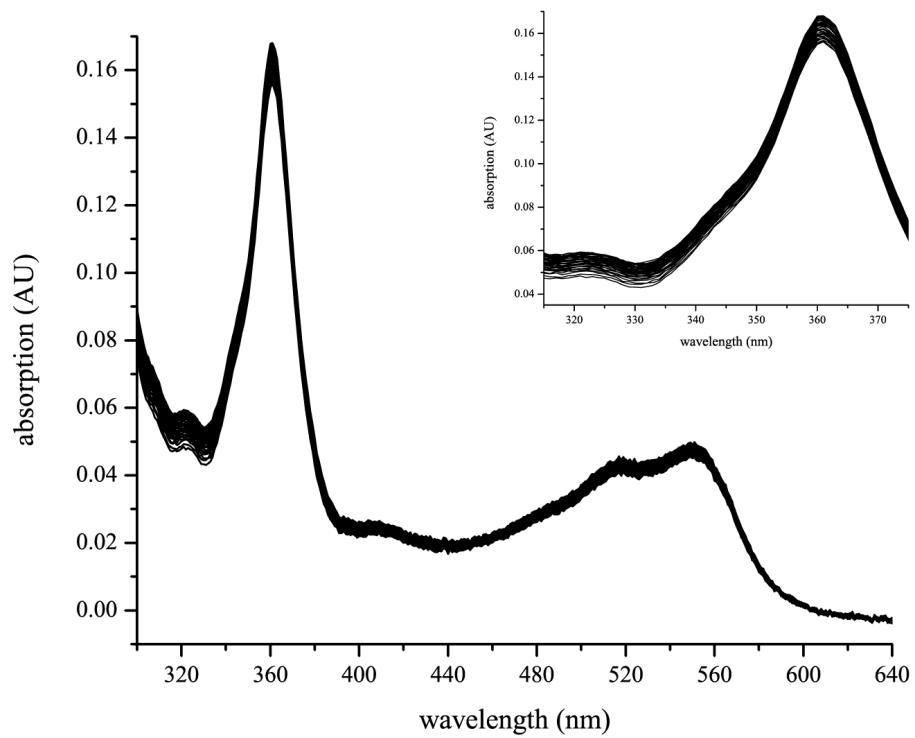

104

105 **Supplementary Figure 9 Monitoring cyano-Cbl binding by BtuM<sub>Td</sub> by spectral changes**

106 Similar to the experiment in **Supplementary Figure 8 b** spectral changes in BtuM<sub>Td</sub>-cHis8 upon  
107 substrate binding were followed over time. A molar ratio of substrate to protein of 1:1 was used and  
108 spectra were taken every 20 minutes for 12 hours. Because binding would lead to the spectral changes  
109 observed in **Figure 2 b**, we conclude that we do not observe binding.

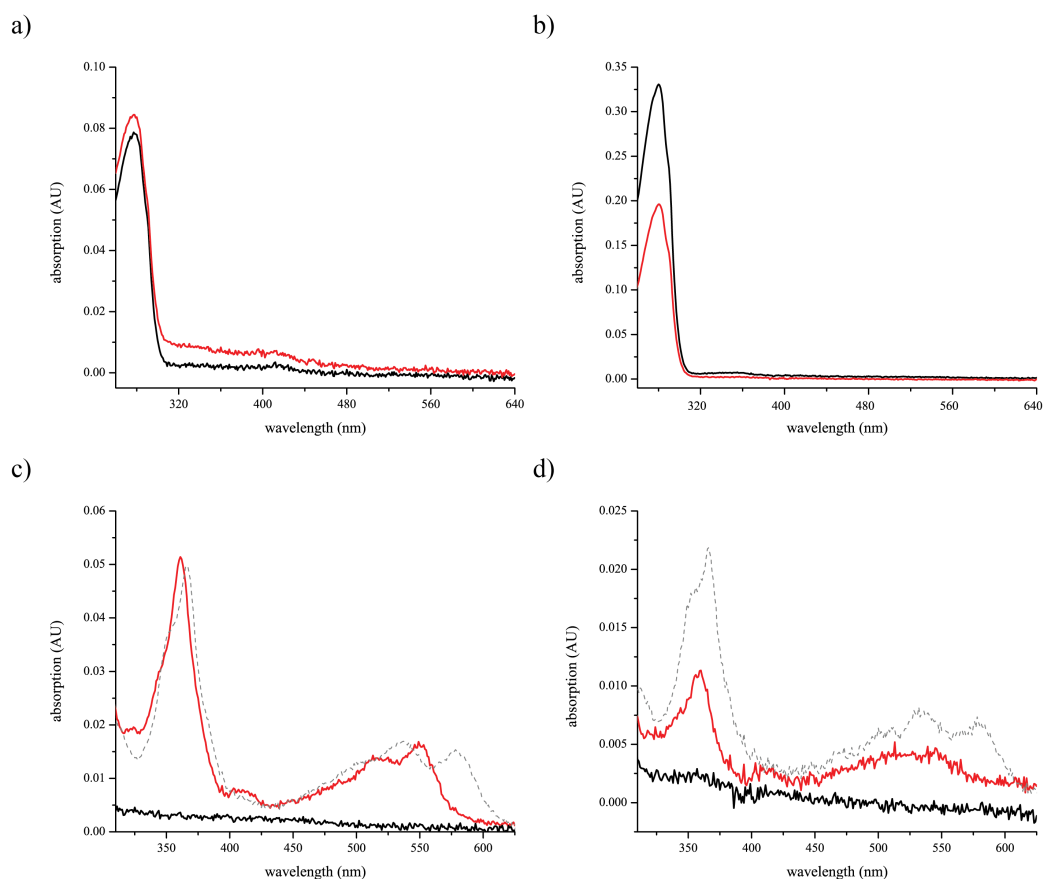

110

111 **Supplementary Figure 10 Absorption spectra of *apo* BtuM<sub>Td</sub> and mutants C80A and C80S**

112 (a) Absorption spectra of *apo* EPEA-tagged BtuM<sub>Td</sub> (black line) and BtuM<sub>Td</sub>-C80S (red line) showing  
 113 that the protein purifies in its *apo* state when no substrate is added. (b) The absorption spectra of His-  
 114 tagged BtuM<sub>Td</sub>-C80A (black line) and C80S (red line) purified in the presence of Cbl show that no  
 115 substrate is bound. (c) and (d) The two mutant variants BtuM<sub>Td</sub>-C80A and C80S were purified in  
 116 conditions where wild-type BtuM<sub>Td</sub> binds Cbl and Cbi. BtuM<sub>Td</sub>-C80A (c) and BtuM<sub>Td</sub>-C80S (d) did  
 117 not bind Cbl (black line, same data as in b) but still bound Cbi (red line). Binding of Cbi did not lead to  
 118 the spectral changes as observed for the native protein (compare **Figure 2 b and c**). Spectra of 2 μM  
 119 (c) and 1 μM (d) unbound Cbi (dashed grey line) are included for comparison.

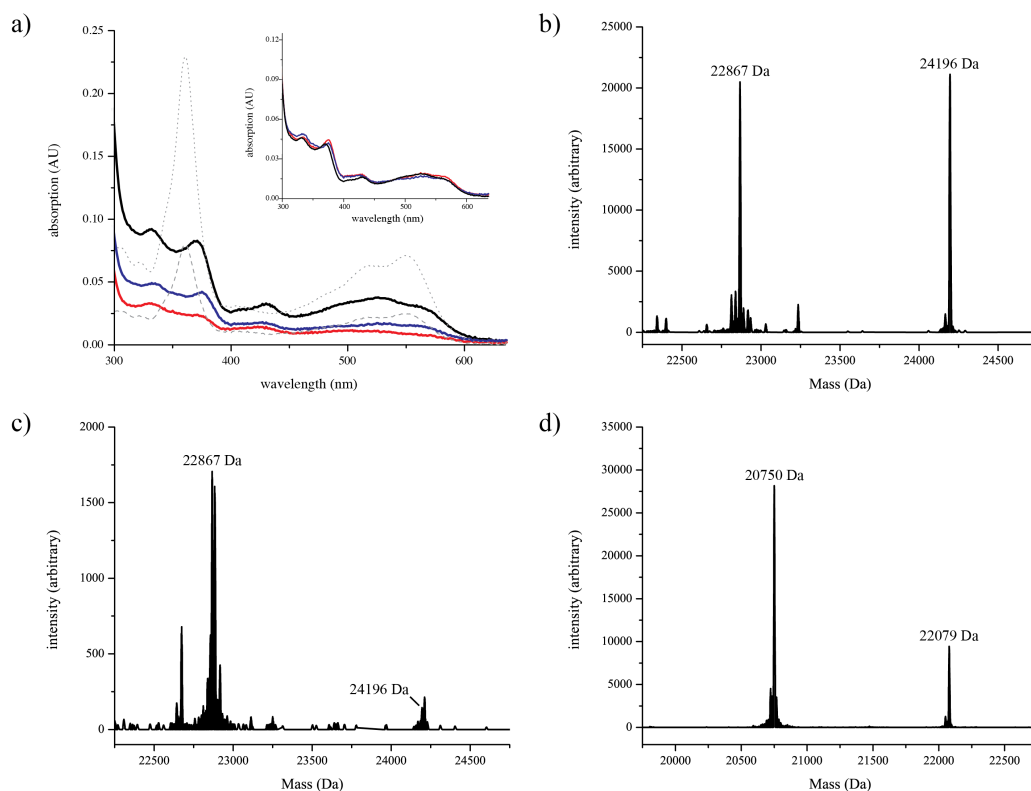

120

121

**Supplementary Figure 11 Absorption spectra and high-resolution mass spectra of BtuM<sub>Td</sub> mutants bound to Cbl**

122

123 (a) The absorption spectra of Cbl bound to BtuM<sub>Td</sub>\_H28A (black line, 8.7 μM), Y85L (red line, 3.1

124 μM), and R153A (blue line, 4.4 μM) show the characteristic changes of cysteine binding and

125 decyanation. For comparison spectra of free Cbl are shown at concentrations of 3 μM and 8.5 μM, grey

126 dashed and dotted line, respectively. The inset shows scaled spectra of the mutants to emphasize that

127 spectral changes caused by binding to mutants of BtuM<sub>Td</sub> are essentially the same (inset) and apparent

128 differences are caused by different concentrations. (b) Mass spectrum of BtuM<sub>Td</sub>\_H28A shows two

129 peaks corresponding to the formylated *apo* protein (22867 Da) and the formylated, Cbl-bound protein

130 (24196 Da). The mass difference of 1329 Da is consistent with decyanation. (c) Same for the Y85L

131 mutant (d) Same for the R153A mutant.

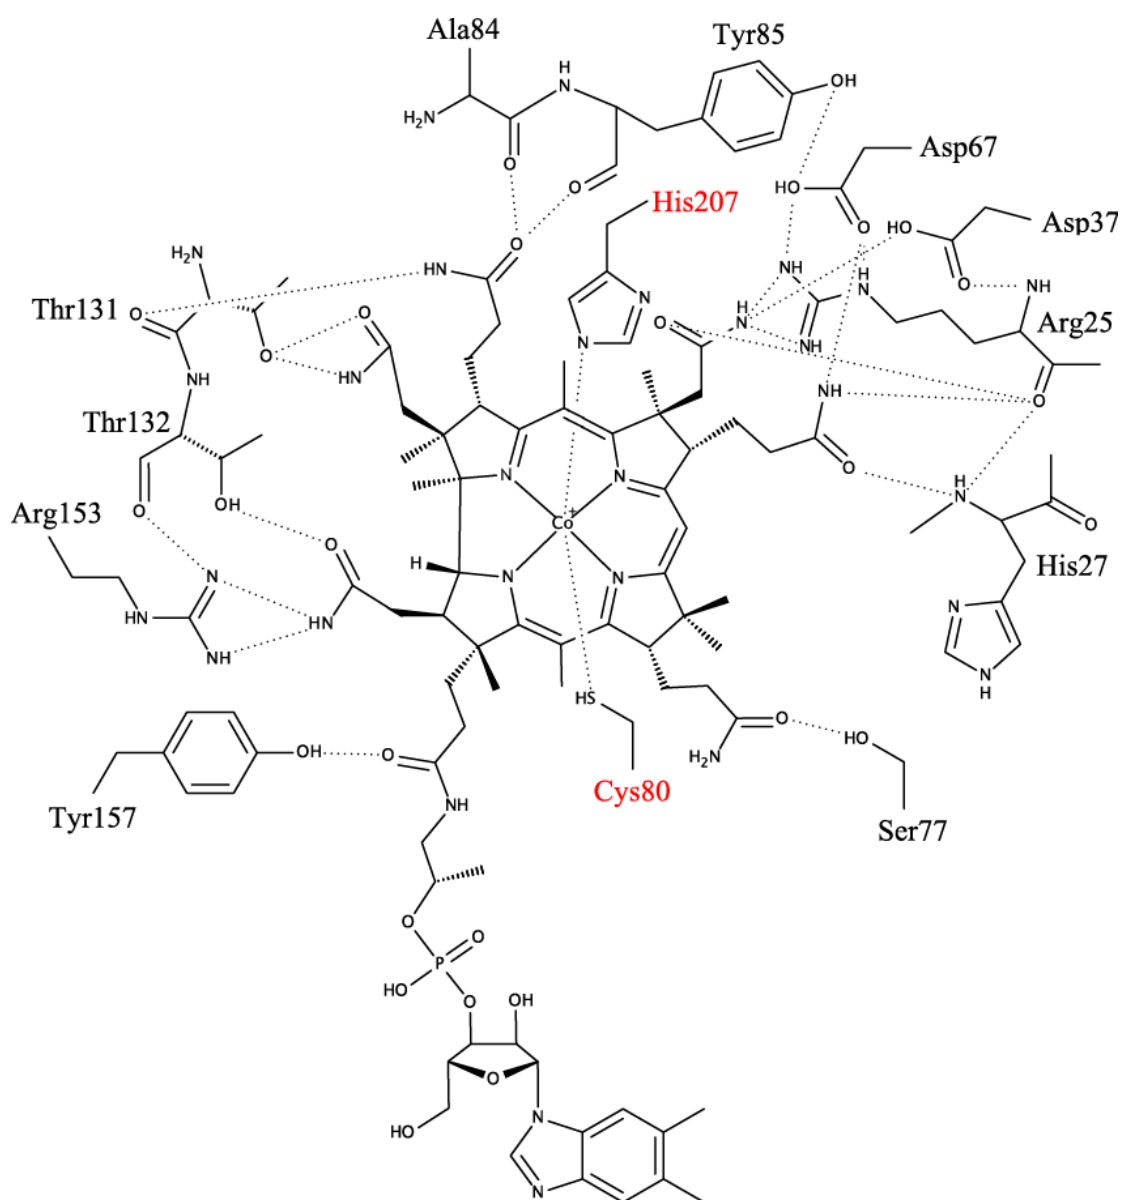

132

133 **Supplementary Figure 12 Depiction of hydrogen bond network in the binding pocket of Cbl with**  
 134 **BtuM<sub>Td</sub>**

135 Next to the major interactions of the sulphur and nitrogen of Cys80 and His207 with the cobalt ion of  
 136 Cbl there are a variety of side chain and backbone interactions with corrin-ring decorating moieties.



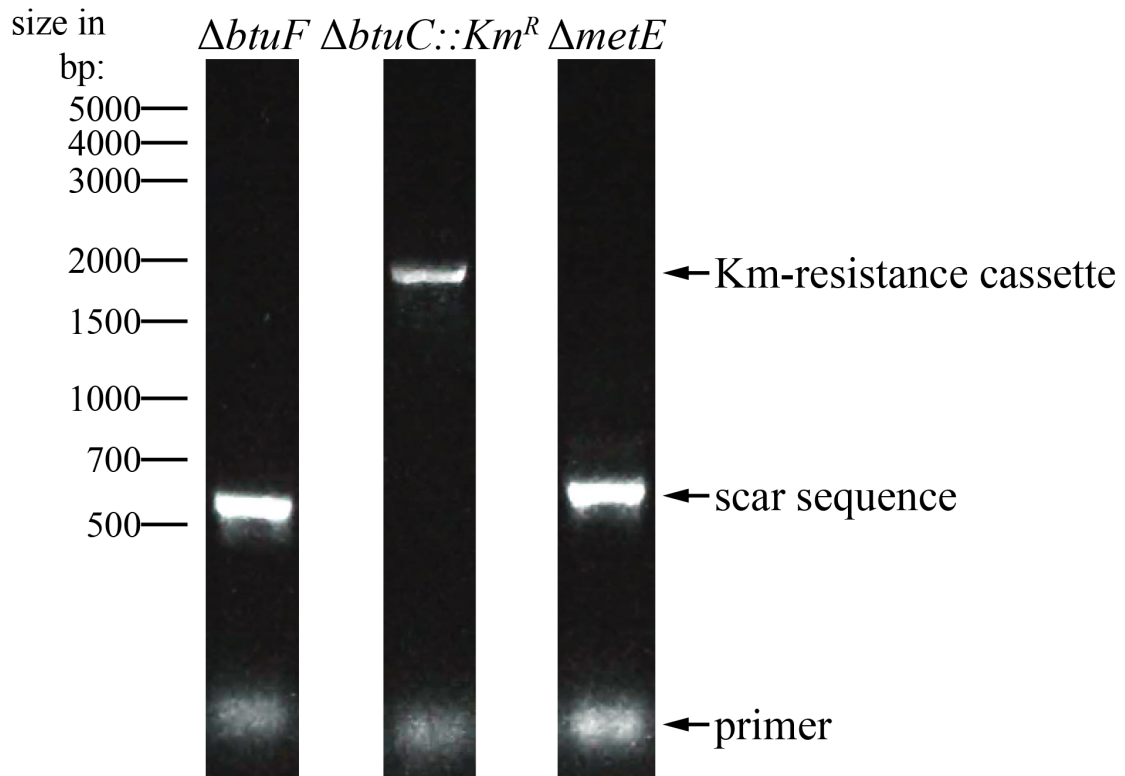

137

138 **Supplementary Figure 13 Colony PCR of *E. coli* ΔFEC displaying correct deletion of target**  
 139 **genes**

140 An agarose gel of a colony PCR using primers designed in such way (see Materials and Methods) that  
 141 wild-type loci can be distinguished from either the scar sequence left after FLP-treatment or the  
 142 kanamycin resistance cassette after P1 insertion. The expected PCR product sizes for the native loci are  
 143 981 base pairs (bp) for *btuC*, 801 bp for *btuF* and 2262 bp for *metE*.

144

145 **Supplementary Table 1 RMSD value matrix (in Å) of the structural comparison**  
146 **between full length BtuM<sub>Td</sub> and ThiT and BioY and FolT**

|                          | <b>BtuM<sub>Td</sub></b> | <b>ThiT</b> | <b>BioY</b> | <b>FolT</b> |
|--------------------------|--------------------------|-------------|-------------|-------------|
| <b>BtuM<sub>Td</sub></b> | 0.0                      | 3.1         | 3.2         | 3.1         |
| <b>ThiT</b>              | 3.1                      | 0.0         | 2.8         | 2.6         |
| <b>BioY</b>              | 3.2                      | 2.8         | 0.0         | 2.9         |
| <b>FolT</b>              | 3.1                      | 2.6         | 2.9         | 0.0         |

147

| <b>Primer name</b>       | <b>Sequence (5'-3')</b>                                 |
|--------------------------|---------------------------------------------------------|
| BtuM_opt_NcoI_frwd       | GGTCCATGGGTCTGAATC                                      |
| BtuM_NcoI_long_frwd      | GGTCCATGGGTCTGAATCTGACCCGTCGTCAGCAG<br>ATTGC            |
| BtuM_Td_opt_C80S_frwd    | GTTAGCGATTTTTCTGTTAGTCCGGC                              |
| BtuM_Td_opt_C80S_rev     | GCCGGACTAACAGAAAAATCGCTAAC                              |
| BtuM_Td_opt_C80A_frwd    | GGTGTTAGCGATTTTGC GGTTAGTCCGGCATATTG                    |
| BtuM_Td_opt_C80A_rev     | CAATATGCCGGACTAACCGCAAAATCGCTAACACC                     |
| BtuM_Td_opt_H28A_frwd    | GACCCGTAGCCATGCTTGGGCAAGCATTC                           |
| BtuM_Td_opt_H28A_rev     | GAATGCTTGCCCAGCGATGGCTACGGGTC                           |
| BtuM_Td_opt_D67A_frwd    | GATTGCAGCAAGCGTTGTTATTGCTTATGTTG                        |
| BtuM_Td_opt_D67A_rev     | CAGGTAATTGCAACATAAGCAATAACAACG                          |
| BtuM_Td_opt_Y85L_frwd    | GTTAGTCCGGCACTTTGGCTGCTG                                |
| BtuM_Td_opt_Y85L_rev     | GCAGCCAAAGTGCCGGACTAACAC                                |
| BtuM_Td_opt_R153A_frwd   | CAGGTCTGGTGCTGGCTCTGGAAAAATAC                           |
| BtuM_Td_opt_R153A_rev    | GTATTTTTCCAGAGCCAGCACCAGACCTG                           |
| BtuM_Td_opt_no-cHis8_rev | GCCAAGCTTTCATTAACGTTACGACGGG                            |
| BtuM_Td_cEPEA-           | GATAAGCTTTCATTATGCCTCTGGTTCACGTTACAG                    |
| HindIII_rev              | ACGGG                                                   |
| BtuC_frwd                | GCAGGAGGAATTCACCATGCTGACACTTGCCCGC                      |
| BtuC_rev                 | GAATTCCTCCTATTGATTACTAACGTCCTGCTTTTA<br>ACAATAACCAG     |
| BtuF_frwd                | GACGTTAGTAATCAATAGGAGGAATTCACCATGGC<br>TAAGTCACTGTTCAGG |
| BtuF_rev                 | GCCAAAACAGCCAAGCTTTTACTAATCTACCTGTG                     |

|             |                        |
|-------------|------------------------|
|             | AAAGCGCATTAC           |
| pBAD24_frwd | TTAAAGCTTGGCTGTTTTGGCG |
| pBAD24_rev  | GGTGAATTCCTCCTGCTAGC   |
| Seq_frwd    | CTCTACTGTTTCTCCATACCCG |
| Seq_rev     | GCTGAAAATCTTCTCTCATCCG |

---
